# Supplementary material for: Cost‐Effectiveness of Ivabradine for Heart Failure in the United States
Source: PubMed Central journal article supplement — J Am Heart Assoc. 2016 May 6;5(5):e003221. doi: 10.1161/JAHA.116.003221 (PMC4889192; doi:10.1161/jaha.116.003221), 2016-05-06
Supplement: JAH3-5-e003221-s001.pdf [file JAH3-5-e003221-s001.pdf]

## **SUPPLEMENTAL MATERIAL**

**Table S1. Annual Hospitalization Rates From US Claims**

| Parameter (Type/Number of Hospitalization[s]) | Commercial Reference Rate (95% CI) (Base Case) | Medicare Advantage Reference Rate |
|-----------------------------------------------|------------------------------------------------|-----------------------------------|
| First HF for patients with no non-HF CV       | 0.54 (0.50-0.59)                               | 0.66                              |
| First HF for patients with 1+ non-HF CV       | 0.91 (0.75-1.09)                               | 1.13                              |
| 2 HF                                          | 2.01 (1.67-2.39)                               | 2.01                              |
| 3 HF                                          | 2.01 (1.67-2.39)                               | 2.01                              |
| ≥ 3 HF                                        | 2.01 (1.67-2.39)                               | 2.01                              |
| Non-HF CV for patients with 0 CV              | 0.05 (0.04-0.05)                               | 0.06                              |
| Non-HF CV for patients with 1 CV              | 0.14 (0.13-0.16)                               | 0.19                              |
| Non-HF CV for patients with 2 CV              | 0.19 (0.16-0.22)                               | 0.25                              |
| Non-HF CV for patients with ≥ 3 CV            | 0.28 (0.23-0.34)                               | 0.38                              |
| Non-CV                                        | 0.52 (0.50-0.54)                               | 0.65                              |

Source: US claims hospitalization rates analysis scaled based on SHIFT hospitalization

rates. Analysis of SHIFT trial data showed that patients are subject to higher risk of HF hospitalization as they experience more HF hospitalizations, and are subject to higher risk of non-HF CV hospitalization as they experience more CV hospitalizations. The US claims data analysis only estimated the cumulative (1, 2, and ≥ 3) hospitalization rate for HF and non-HF CV hospitalizations. To derive the hospitalization rate specifically for 1, 2, and ≥ 3 hospitalizations based on the cumulative rate from US claims data, the corresponding cumulative rates were estimated in SHIFT and then used to estimate a scaling factor (US claims data rate/SHIFT rate) between the hospitalization rate from US claims data and SHIFT. This scaling factor was then applied to the event rates in Supplemental Table 2 to

derive the hospitalization rate for 1, 2, and  $\geq 3$  hospitalizations for US claims data. To minimize the risk of overestimating hospitalization rates using US claims data, the rate was capped at the highest rate reported in SHIFT (2.01).

CI indicates confidence interval; CV, cardiovascular; HF, heart failure; and SHIFT, Systolic Heart failure treatment with the  $I_f$  inhibitor ivabradine Trial.

**Table S2. Annual Hospitalization Rates and Treatment Effect on Hospitalization  
From SHIFT**

| Parameter (Type/Number of Hospitalization[s]) | Hospitalization Rate<br>(Reference Case) | Hazard Ratio<br>(95% CI)<br>Ivabradine vs Placebo |
|-----------------------------------------------|------------------------------------------|---------------------------------------------------|
| First HF for patients with no non-HF CV       | 0.12                                     | 0.73 (0.64-0.82)                                  |
| First HF for patients with 1+ non-HF CV       | 0.20                                     | 0.84 (0.63-1.11)                                  |
| 2 HF                                          | 0.66                                     | 0.84 (0.70-1.01)                                  |
| 3 HF                                          | 0.99                                     | 1.09 (0.83-1.42)                                  |
| ≥ 3 HF                                        | 2.01                                     | 0.94 (0.73-1.21)                                  |
| Non-HF CV for patients with 0 CV              | 0.12                                     | 0.97 (0.86-1.09)                                  |
| Non-HF CV for patients with 1 CV              | 0.37                                     | 0.99 (0.83-1.18)                                  |
| Non-HF CV for patients with 2 CV              | 0.48                                     | 1.08 (0.83-1.39)                                  |
| Non-HF CV for patients with ≥ 3 CV            | 0.72                                     | 0.96 (0.74-1.24)                                  |
| Non-CV                                        | 0.14                                     | 0.89 (0.80-0.98)                                  |

Source: SHIFT data analysis.

CI indicates confidence interval; CV, cardiovascular; HF, heart failure; and SHIFT, Systolic Heart failure treatment with the  $I_f$  inhibitor ivabradine Trial.

**Table S3. Annual Mortality Rates and Hazard Ratios Derived From SHIFT Data**

| Parameter              | Annual Incidence Rate<br>for Background Therapy<br>(95% CI)           | Hazard Ratio<br>(95% CI)<br>Ivabradine vs Placebo |
|------------------------|-----------------------------------------------------------------------|---------------------------------------------------|
| HF mortality           | 0.026 (0.022-0.030)                                                   | 0.74 (0.58-0.94)                                  |
| Non-HF CV<br>mortality | 0.057 (0.052-0.064)                                                   | 0.98 (0.84-1.14)                                  |
| Non-CV mortality       | Informed by US life table<br>adjusted to exclude CV-related<br>deaths |                                                   |

Source: SHIFT data analysis.

CI indicates confidence interval; CV, cardiovascular; HF, heart failure; and SHIFT, Systolic Heart failure treatment with the  $I_f$  inhibitor ivabradine Trial.

**Table S4. AE Rates per Year**

| Type of AE               | Annual Event Rate,<br>Placebo, % | Annual Event Rate,<br>Ivabradine, % |
|--------------------------|----------------------------------|-------------------------------------|
| Asymptomatic bradycardia | 0.8                              | 3.6                                 |
| Symptomatic bradycardia  | 0.6                              | 2.9                                 |
| Atrial fibrillation      | 4.6                              | 5.8                                 |
| Blurred vision           | 0.1                              | 0.4                                 |
| Phosphenes               | 0.3                              | 1.8                                 |

Source: SHIFT data analysis.

AE indicates adverse event; and SHIFT, Systolic Heart failure treatment with the  $I_f$  inhibitor ivabradine Trial.

**Table S5. Hospitalization and AE Costs**

|                                          | Cost per Event<br>Commercial, \$ | Cost per Event<br>Medicare<br>Advantage, \$ | Reference/Resource Used                                                                                                           |
|------------------------------------------|----------------------------------|---------------------------------------------|-----------------------------------------------------------------------------------------------------------------------------------|
| Type of hospitalization (survive or die) |                                  |                                             |                                                                                                                                   |
| First HF                                 | 39,779                           | 24,746                                      | US claims data                                                                                                                    |
| Second HF                                | 31,171                           | 19,899                                      | US claims data                                                                                                                    |
| ≥ Third HF                               | 32,422                           | 18,684                                      | US claims data                                                                                                                    |
| First non-HF CV                          | 29,082                           | 18,596                                      | US claims data                                                                                                                    |
| Second non-HF CV                         | 27,684                           | 16,082                                      | US claims data                                                                                                                    |
| Third+ non-HF CV                         | 30,915                           | 15,610                                      | US claims data                                                                                                                    |
| Non-CV related                           | 17,904                           | 11,489                                      | US claims data                                                                                                                    |
| Type of AE                               |                                  |                                             |                                                                                                                                   |
| Asymptomatic<br>bradycardia              | 142                              | 73                                          | Physician visit for cardiac<br>issue of “moderate<br>severity” <sup>1,2</sup>                                                     |
| Symptomatic<br>bradycardia               | 686                              | 367                                         | Physician visit for cardiac<br>issue of “moderate severity”<br>or ED visit for cardiac issue<br>of “high severity” <sup>1,2</sup> |
| Atrial fibrillation                      | 686                              | 367                                         | Physician visit for cardiac<br>issue of “moderate severity”<br>or ED visit for cardiac issue<br>of “high severity” <sup>1,2</sup> |

---

|                |     |     |                                                                                  |
|----------------|-----|-----|----------------------------------------------------------------------------------|
| Blurred vision | 187 | 126 | Physician visit for<br>comprehensive<br>ophthalmological services <sup>1,2</sup> |
| Phosphenes     | 187 | 126 | Physician visit for<br>comprehensive<br>ophthalmological services <sup>1,2</sup> |

---

AE indicates adverse event; CV, cardiovascular; ED, emergency department; and HF, heart failure.



**Table S6. Utility Regression Equations**

| Independent Variable                     | Parameter Estimates                                  |                                      |
|------------------------------------------|------------------------------------------------------|--------------------------------------|
|                                          | Explicit No. of Hospitalizations (SE)<br>(Base Case) | Minimum No. of Hospitalizations (SE) |
| Intercept                                | 0.425 (0.008)                                        | 0.425 (0.008)                        |
| Treatment                                | 0.009 (0.005)                                        | 0.009 (0.005)                        |
| Beta-blocker use (no vs yes) at baseline | -0.011 (0.008)                                       | -0.011 (0.008)                       |
| Baseline EQ-5D index score               | -0.540 (0.010)                                       | -0.540 (0.010)                       |
| ≥ 1 HF hospitalization                   |                                                      | -0.084 (0.006)                       |
| ≥ 1 non-HF CV hospitalization            |                                                      | -0.032 (0.005)                       |
| 1 HF hospitalization                     | -0.076 (0.007)                                       |                                      |
| 2 HF hospitalizations                    | -0.074 (0.013)                                       |                                      |
| ≥ 3 HF hospitalizations                  | -0.133 (0.016)                                       |                                      |
| 1 non-HF CV hospitalization              | -0.020 (0.006)                                       |                                      |
| 2 non-HF CV hospitalizations             | -0.053 (0.011)                                       |                                      |
| 3 non-HF CV hospitalizations             | -0.072 (0.015)                                       |                                      |

Source: PRO-SHIFT study data analysis (Amgen Data on File, 2014)

CV indicates cardiovascular; EQ-5D, EuroQol-5D; HF, heart failure; SE, standard error; and SHIFT, Systolic Heart failure treatment with the  $I_f$  inhibitor ivabradine Trial.
